# Supplementary figures and images for: Pramipexole has a neuroprotective effect in spinal cord injury and upregulates D2 receptor expression in the injured spinal cord tissue in rats
Source: PeerJ journal article supplement (doi:10.7717/peerj.16039), 2023-09-11

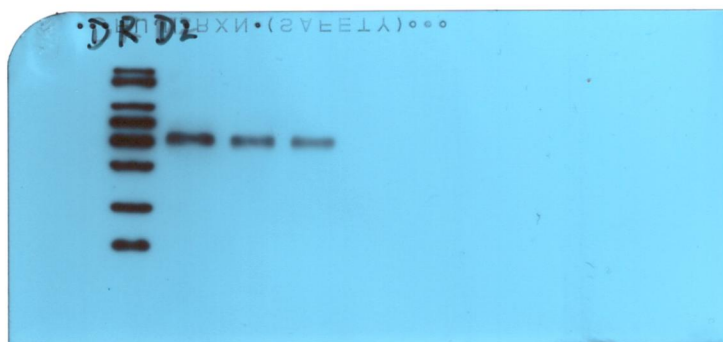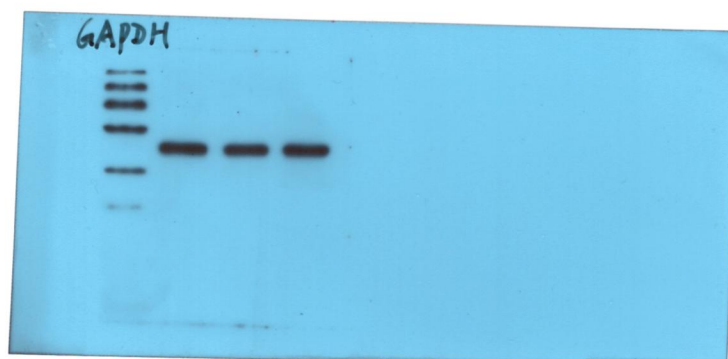

Supplement: Raw_data.zip [file Raw_data.zip]

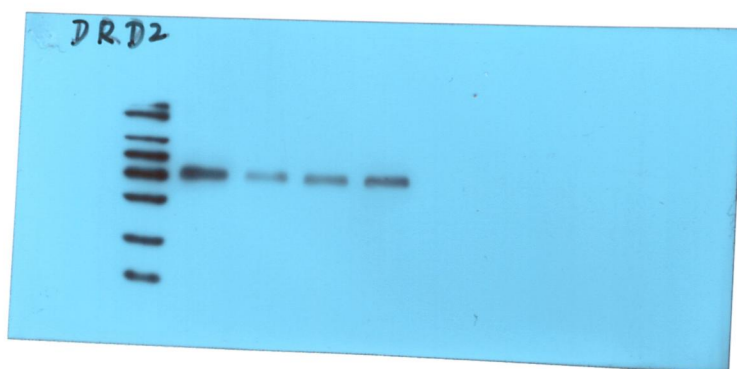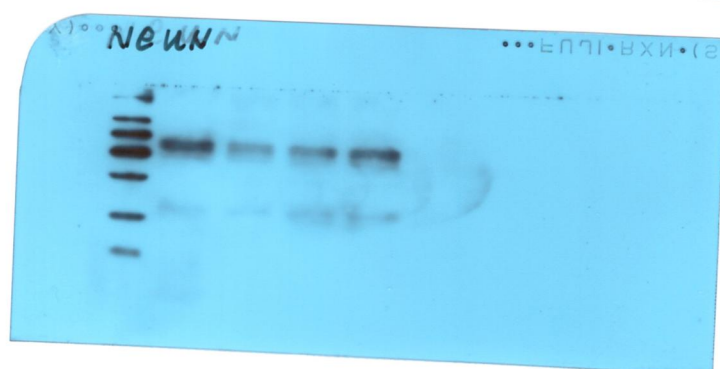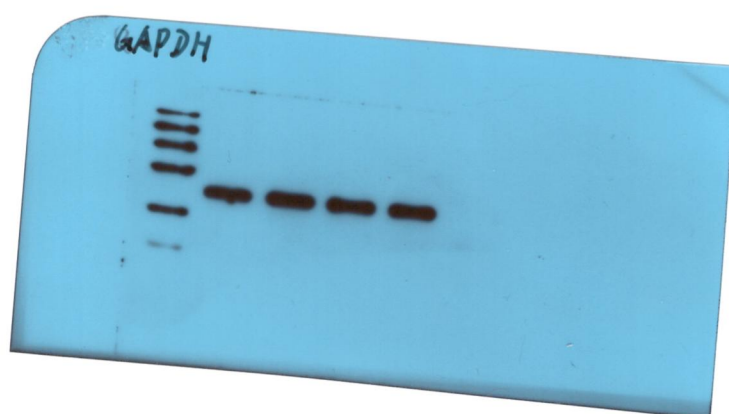

Supplement: Raw_data.zip [file Raw_data.zip]

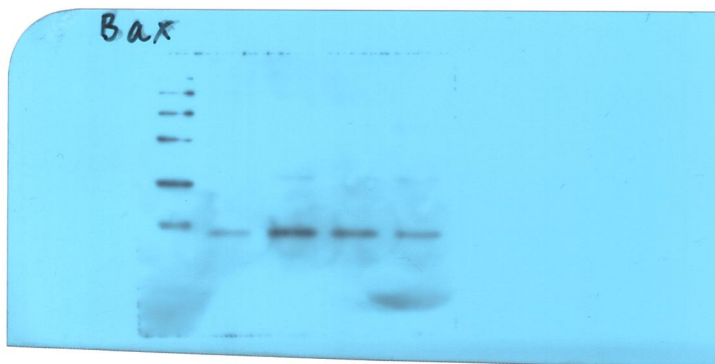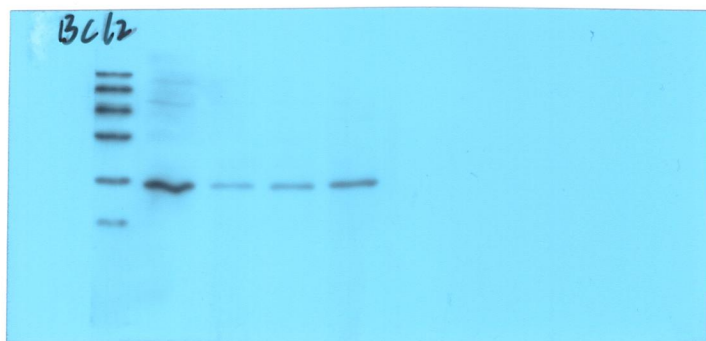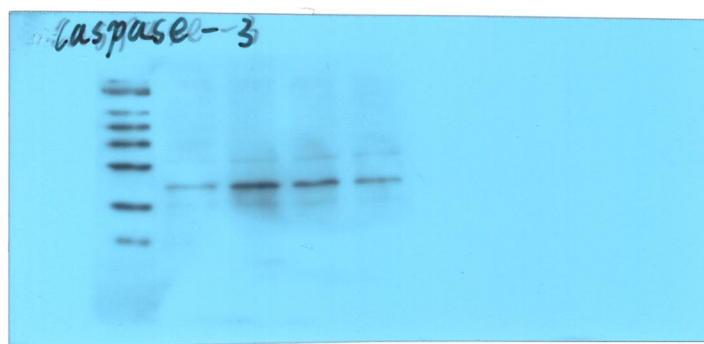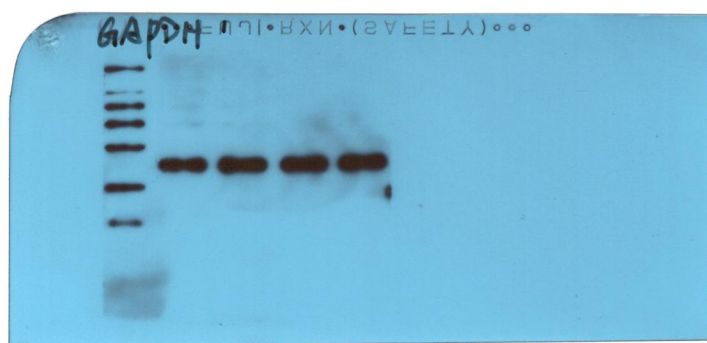

Supplement: Raw_data.zip [file Raw_data.zip]

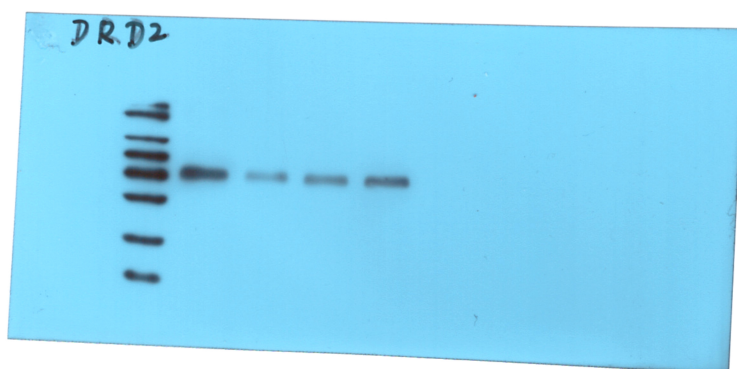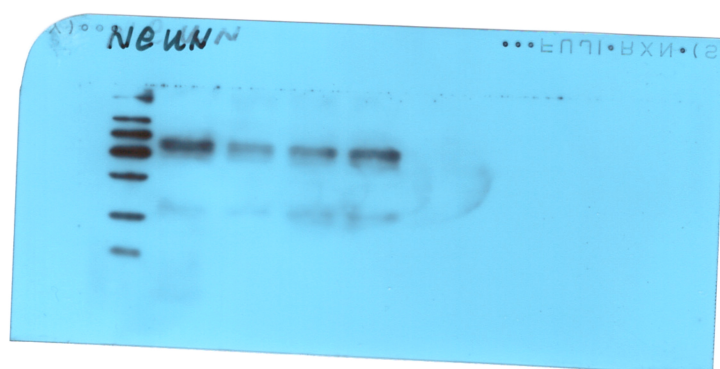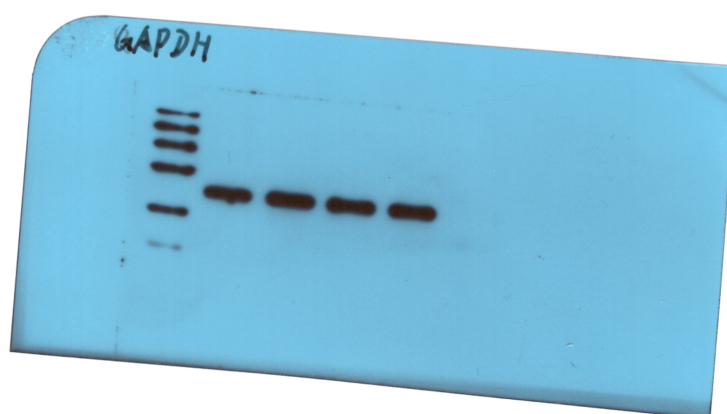

Supplement: WB_blots.zip [file WB_blots.zip]

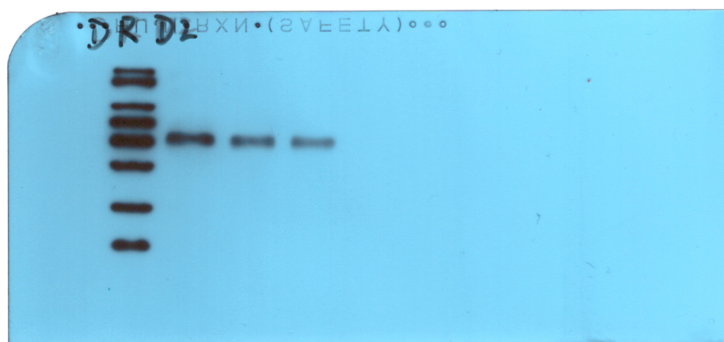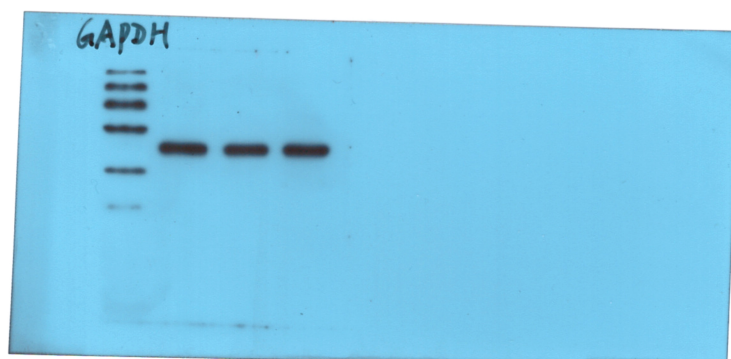

Supplement: WB_blots.zip [file WB_blots.zip]

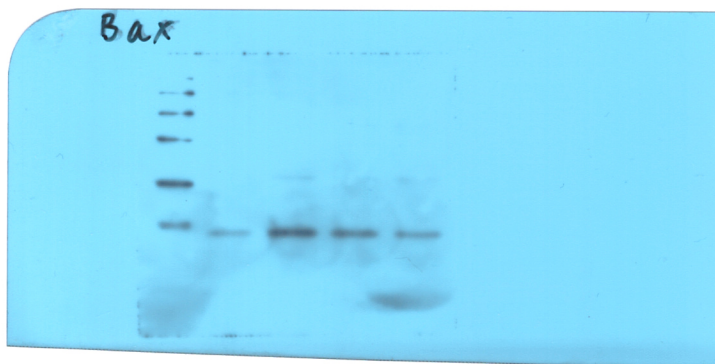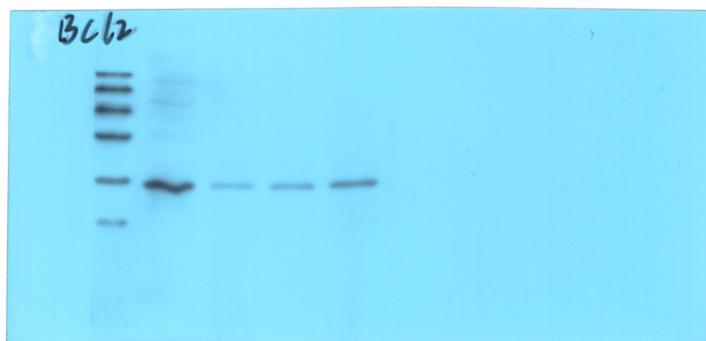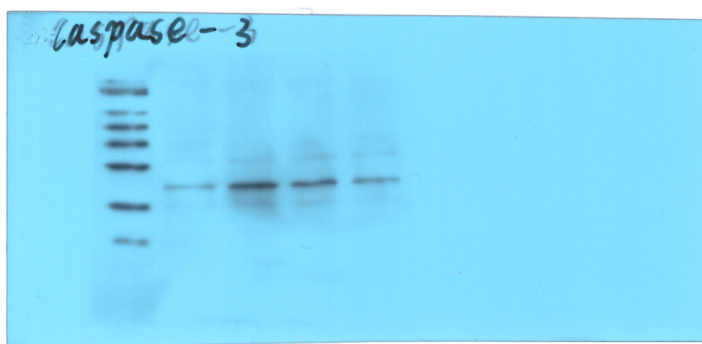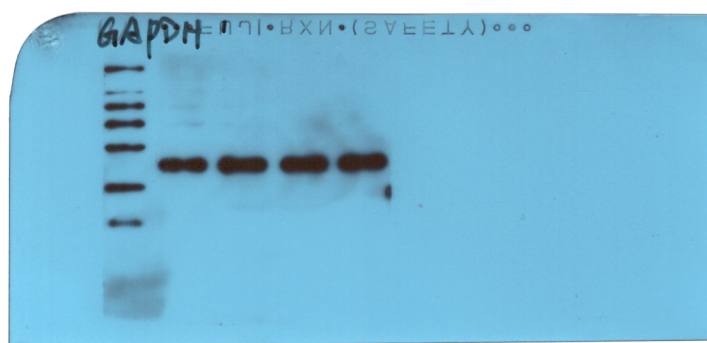

Supplement: WB_blots.zip [file WB_blots.zip]
